# Supplementary material
Source: PubMed Central journal article supplement (PMC4187102)

## SUPPLEMENTAL MATERIAL

### Supplement I. Spot sign score

| <b>Spot Sign Characteristics*</b> | <b>Points</b> |
|-----------------------------------|---------------|
| <b>No of spot signs</b>           |               |
| 1-2                               | 1             |
| $\geq 3$                          | 2             |
| <b>Maximum axial dimension</b>    |               |
| 1-4 mm                            | 0             |
| $\geq 5$ mm                       | 1             |
| <b>Maximum attenuation</b>        |               |
| 120-179 HU                        | 0             |
| 180 HU                            | 1             |

\*The spot sign characterization is performed in the first CTA acquisition in which a spot sign is identified. For CTA's with more than 1 spot sign, the maximum dimension in a single axial CTA source image and maximum attenuation of the largest spot sign is determined. The spot sign score is obtained by adding up the total number of points. HU indicates Hounsfield unit; CTA, CT angiogram.

Supplement II. Correlation of Spot Sign score with the percent of patients with a significant ICH expansion.

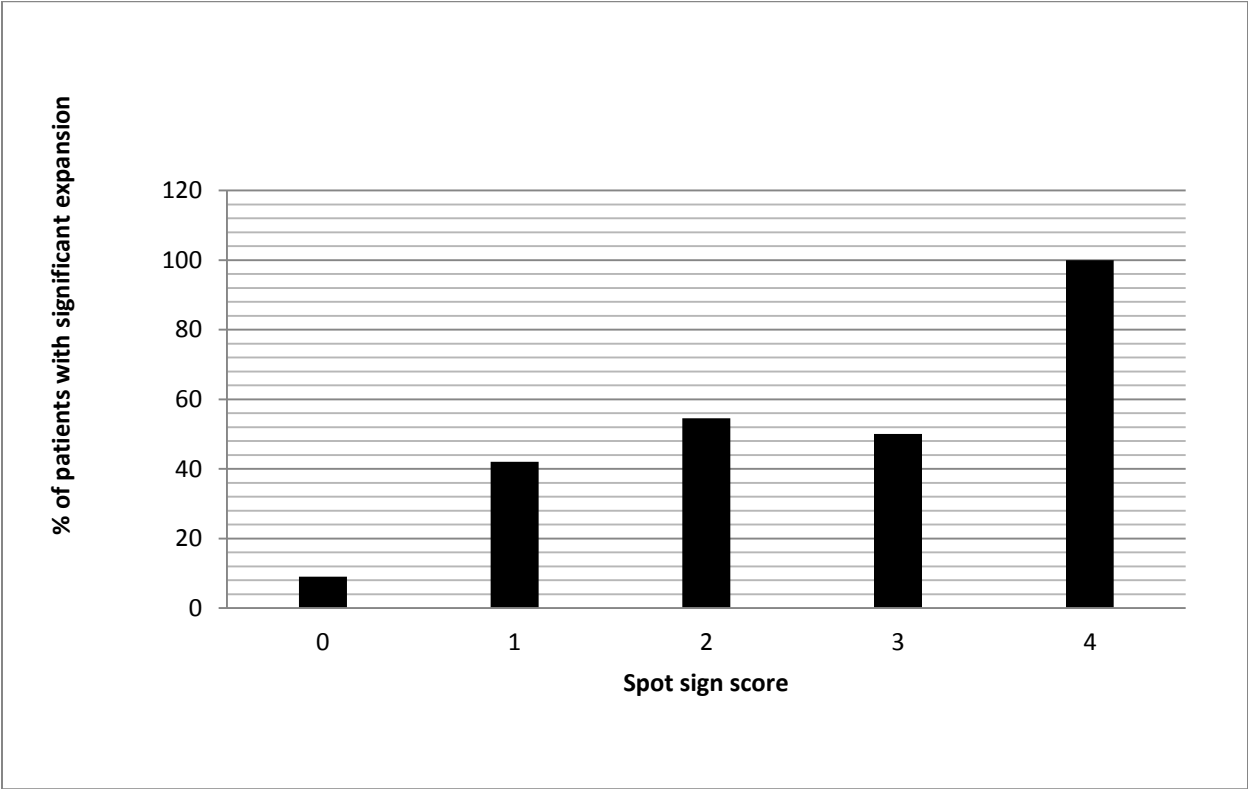

Supplement III. Correlation of the Spot Sign score with mortality (% of patients) at 3months.

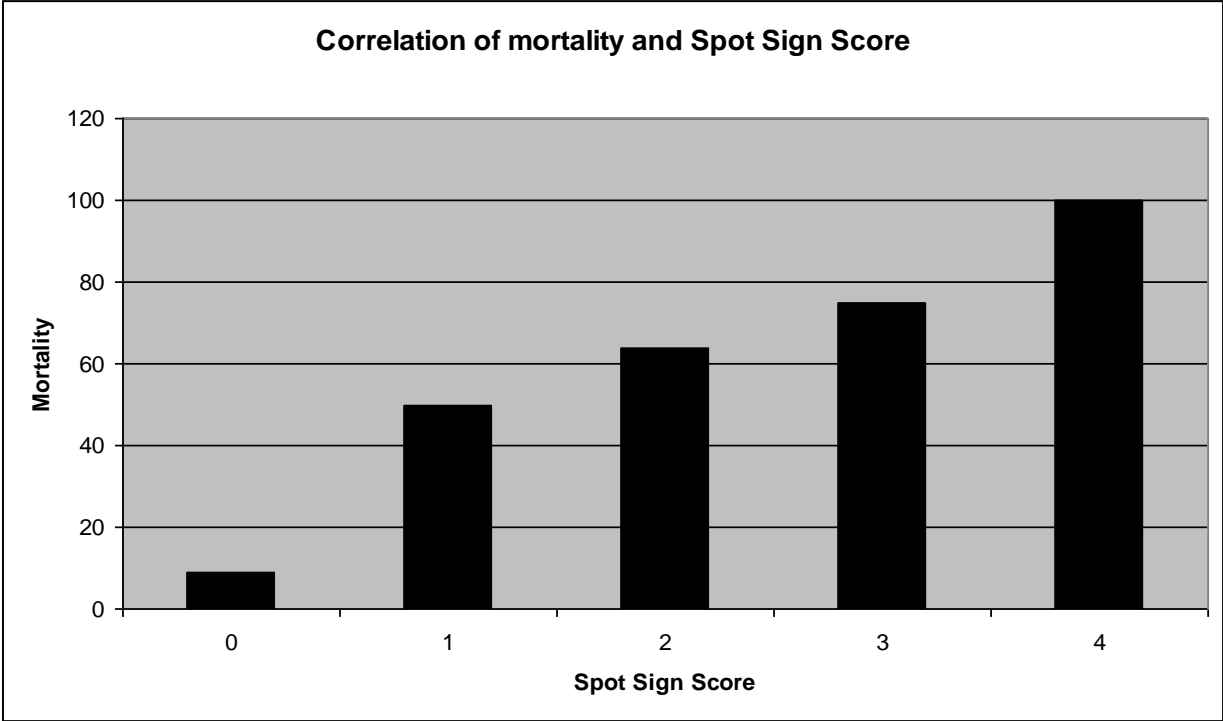

Supplement: NIHMS524841-supplement-1.pdf [file NIHMS524841-supplement-1.pdf]
